# Supplementary material for: Proteomic Investigations of Proteases Involved in Cotyledon Senescence: A Model to Explore the Genotypic Variability of Proteolysis Machinery Associated with Nitrogen Remobilization Efficiency during the Leaf Senescence of Oilseed Rape
Source: MDPI journal article supplement (doi:10.3390/proteomes5040029), 2017-11-02
Supplement: s1 [file s1]

## Supplemental Tables

**Supplemental Table S1: Identified serine hydrolases labeled with FP-biotin in senescent cotyledons of oilseed rape (cv. Ténor) after 5 days of LN treatment.** To characterize the serine hydrolases observed in Figure 2, labeling with FP-biotin was performed and followed by a pull-down of biotinylated proteins (Figure 3). LC-MS/MS spectra were searched against the *Viridiplantae* database focusing on *Brassica napus* L. using MASCOT 2.5.0 and only scores higher or equal to 41 were considered. The assigned protein with the best match is provided alongside the Uniprot accession number (if available) or NCBI/GenBank accession number. Score, queries matched, peptide matches, different peptide matches, experimental mass, theoretical mass and classification of serine hydrolases are also presented.

| Zone (kDa) | Protein [ <i>Brassica napus</i> ] UniProt or NCBI accession no. | Score | Queries Matched | Peptides matched | Different matched peptides | Exp. Mass (Da) | Theo. Mass (Da) | Theo. pI | Classification |
|------------|-----------------------------------------------------------------|-------|-----------------|------------------|----------------------------|----------------|-----------------|----------|----------------|
| 1 (70)     | PREDICTED: serine carboxypeptidase-like 49 XP_013676539         | 100   | 12              | 6                | 5                          | 58335          | 58372.2         | 5.03     | S10            |
|            | Lipase_GDSL A0A078JNT9                                          | 81    | 5               | 4                | 3                          | 34584          | 34605.51        | 8.59     | Lipase         |
|            | PREDICTED: subtilisin-like protease SBT1.7 XP_013654072         | 77    | 5               | 4                | 4                          | 73353          | 73398.89        | 7.57     | Subtilisin S8  |
|            | Carboxypeptidase A0A078EDE5                                     | 59    | 2               | 2                | 2                          | 56843          | 56878.91        | 5.35     | S10            |
|            | Carboxypeptidase A0A078GRW5                                     | 54    | 2               | 2                | 2                          | 53488          | 53521.41        | 5.43     | S10            |
| 2 (65)     | PREDICTED: serine carboxypeptidase-like 49 XP_013676539.1       | 62    | 5               | 5                | 5                          | 58335          | 58372.2         | 5.03     | S10            |
| 3 (60)     | Probable carboxylesterase 12 A0A078CLX0                         | 90    | 4               | 4                | 4                          | 34316          | 34337.89        | 5.23     | CXEs           |
|            | Carboxypeptidase A0A078BZ09                                     | 71    | 10              | 4                | 4                          | 53907          | 53941.01        | 6.43     | S10            |
|            | PREDICTED: subtilisin-like protease SBT1.7 XP_013654072.1       | 61    | 5               | 4                | 4                          | 73353          | 73398.89        | 7.57     | Subtilisin S8  |
| 4 (55)     | GDSL esterase/lipase A0A078H579                                 | 195   | 12              | 8                | 8                          | 48149          | 48180.03        | 7.2      | Lipase         |
|            | alpha-L-fucosidase 3-like A0A078FHK0                            | 186   | 12              | 8                | 8                          | 48820          | 48851.72        | 6.69     | Lipase         |
|            | GDSL esterase/lipase A0A078HX36                                 | 165   | 9               | 7                | 7                          | 42221          | 42247.84        | 6.44     | Lipase         |
|            | PREDICTED: serine carboxypeptidase-like 35 A0A078G963           | 146   | 22              | 7                | 6                          | 54114          | 54148.29        | 6.83     | S10            |
|            | PREDICTED: subtilisin-like protease SBT1.7 XP_013654072.1       | 125   | 8               | 6                | 6                          | 73353          | 73398.89        | 7.57     | Subtilisin S8  |
|            | PREDICTED: probable carboxylesterase 12 A0A078HJQ8              | 103   | 6               | 5                | 5                          | 35528          | 35550.37        | 5.16     | CXEs           |
|            | PREDICTED: probable carboxylesterase 12 partial XP_013704469.1  | 84    | 5               | 4                | 4                          | 29451          | 29469.5         | 5.38     | CXEs           |
| 5 (50)     | PREDICTED: probable carboxylesterase 12 A0A078HJQ8              | 360   | 24              | 12               | 11                         | 35528          | 35550.37        | 5.16     | CXEs           |

|        |                                                                      |     |    |    |   |       |           |      |                |
|--------|----------------------------------------------------------------------|-----|----|----|---|-------|-----------|------|----------------|
|        | PREDICTED: protease Do-like 1, chloroplastic<br>XP_013644609.1       | 81  | 5  | 5  | 5 | 46206 | 46234.66  | 6    | Deg protease   |
|        | Serine-type carboxypeptidase-like 35<br>A0A078BZ09                   | 61  | 4  | 3  | 3 | 53907 | 53941.01  | 6.43 | S10            |
|        | PREDICTED: probable carboxylesterase 13<br>A0A078JMY7                | 55  | 2  | 2  | 2 | 12594 | 12601.54  | 9.51 | S10            |
| 6 (45) | PREDICTED: probable carboxylesterase 12<br>A0A078HJQ8                | 129 | 10 | 10 | 5 | 35528 | 35550.37  | 5.16 | CXEs           |
|        | PREDICTED: subtilisin-like protease SBT1.7<br>XP_013654072.1         | 65  | 4  | 4  | 4 | 73353 | 73398.89  | 7.57 | Subtilisin S8  |
|        | PREDICTED: serine carboxypeptidase-like 35<br>A0A078G963             | 41  | 2  | 2  | 2 | 54114 | 54148.29  | 6.83 | S10            |
| 7 (40) | PREDICTED: serine carboxypeptidase-like 29<br>A0A078IYZ5             | 131 | 6  | 6  | 4 | 53001 | 53035     | 6.02 | S10            |
|        | PREDICTED: probable carboxylesterase 12<br>A0A078HJQ8                | 122 | 7  | 7  | 5 | 35528 | 35550.37  | 5.16 | CXEs           |
|        | PREDICTED: serine carboxypeptidase-like 29<br>A0A078GRW5             | 108 | 8  | 8  | 3 | 53488 | 53521.41  | 5.43 | S10            |
|        | PREDICTED: serine carboxypeptidase-like 35<br>A0A078G963             | 62  | 6  | 6  | 5 | 54114 | 54148.29  | 6.83 | S10            |
|        | PREDICTED: serine carboxypeptidase-like 20<br>A0A078HQ25             | 52  | 6  | 6  | 3 | 56619 | 56655.77  | 6.21 | S10            |
| 8 (35) | Serine carboxypeptidase-like 29<br>A0A078BV89                        | 199 | 22 | 6  | 6 | 53413 | 53447.24  | 5.28 | S10            |
|        | PREDICTED: serine carboxypeptidase-like 29<br>A0A078GRW5             | 165 | 20 | 6  | 6 | 53488 | 53521.41  | 5.43 | S10            |
|        | PREDICTED: probable carboxylesterase 12<br>A0A078HJQ8                | 105 | 7  | 4  | 4 | 35528 | 35550.37  | 5.16 | CXEs           |
|        | PREDICTED: methylesterase 10-like<br>A0A078EN16                      | 91  | 5  | 3  | 3 | 30212 | 30231.68  | 5.79 | MEs            |
|        | PREDICTED: serine carboxypeptidase-like 29<br>A0A078GF58             | 79  | 3  | 3  | 3 | 53131 | 53164.05  | 5.87 | S10            |
|        | PREDICTED: serine carboxypeptidase-like 51<br>A0A078GVN3             | 78  | 3  | 3  | 3 | 51093 | 51125.51  | 6.74 | S10            |
| 9 (33) | PREDICTED: methylesterase 9-like<br>A0A078BY50                       | 315 | 20 | 9  | 9 | 28749 | 28768.08  | 5.23 | MEs            |
|        | PREDICTED: methylesterase 9-like<br>A0A078CFS2                       | 216 | 13 | 7  | 7 | 28614 | 28632.94  | 5.23 | MEs            |
|        | PREDICTED: probable carboxylesterase 12<br>A0A078HJQ8                | 163 | 8  | 6  | 6 | 35528 | 35550.37  | 5.16 | CXEs           |
|        | PREDICTED: acyl-protein thioesterase 2-like<br>XP_013730870.1        | 98  | 4  | 4  | 4 | 26707 | 26723.43  | 6.15 | Thiol-esterase |
|        | PREDICTED: probable carboxylesterase 12<br>partial<br>XP_013704469.1 | 96  | 6  | 5  | 5 | 29451 | 29469.5   | 5.38 | CXEs           |
|        | PREDICTED: serine carboxypeptidase-like 29<br>A0A078GRW5             | 91  | 5  | 2  | 2 | 53488 | 53521.41  | 5.43 | S10            |
|        | PREDICTED: methylesterase 9-like isoform<br>X2<br>A0A078IOV8         | 77  | 6  | 3  | 3 | 13001 | 130009.93 | 4.77 | MEs            |

|         |                                                                              |     |    |    |   |       |          |      |                |
|---------|------------------------------------------------------------------------------|-----|----|----|---|-------|----------|------|----------------|
| 10 (30) | PREDICTED: probable carboxylesterase 12<br>XP_013701961.1                    | 298 | 22 | 22 | 9 | 35535 | 35557.41 | 5.24 | CXEs           |
|         | PREDICTED: probable carboxylesterase 12<br>A0A078HJQ8                        | 295 | 22 | 22 | 9 | 35528 | 35550.37 | 5.16 | CXEs           |
|         | PREDICTED: serine carboxypeptidase-like 29<br>A0A078GRW5                     | 85  | 7  | 7  | 2 | 53488 | 53521.41 | 5.43 | S10            |
|         | PREDICTED: methylesterase 9-like<br>A0A078BY50                               | 73  | 4  | 4  | 4 | 28749 | 28768.08 | 5.23 | MEs            |
| 11 (25) | PREDICTED: probable carboxylesterase 12<br>A0A078HJQ8                        | 211 | 14 | 7  | 7 | 35528 | 35550.37 | 5.16 | CXEs           |
|         | PREDICTED: serine carboxypeptidase-like 29<br>A0A078GRW5                     | 93  | 9  | 3  | 3 | 53488 | 53521.41 | 5.43 | S10            |
|         | PREDICTED: methylesterase 9-like<br>A0A078BY50                               | 83  | 4  | 4  | 4 | 28749 | 28768.08 | 5.23 | MEs            |
|         | PREDICTED: serine carboxypeptidase-like 20<br>XP_013696030.1                 | 55  | 4  | 3  | 3 | 57750 | 57787.39 | 6.32 | S10            |
|         | PREDICTED: probable carboxylesterase<br>SOBER1-like isoform X2<br>A0A078ECJ1 | 51  | 3  | 2  | 2 | 54591 | 54625.41 | 5.39 | Thiol-esterase |
| 12 (20) | PREDICTED: serine carboxypeptidase-like 29<br>A0A078GRW5                     | 269 | 18 | 8  | 8 | 53488 | 53521.41 | 5.43 | S10            |
|         | PREDICTED: serine carboxypeptidase-like 20<br>XP_013696030.1                 | 155 | 7  | 5  | 5 | 57750 | 57787.39 | 6.32 | S10            |
|         | PREDICTED: serine carboxypeptidase-like 35<br>A0A078BZ09                     | 61  | 5  | 3  | 3 | 53907 | 53941.01 | 6.43 | S10            |

**Supplemental Table S2: Identified Cysteine proteases (CPs) labeled with DCG04 in senescent cotyledons of oilseed rape (cv. Ténor) after 5 days of LN treatment.** To characterize CPs observed in Figure 4, labeling with DCG04 was carried out and followed by a pull-down of biotinylated proteins (Figure 3). LC-MS/MS spectra were searched against the *Viridiplantae* database focusing on *Brassica napus* L. using MASCOT 2.5.0 and only scores higher or equal to 41 were considered. The assigned protein with the best match is provided alongside the Uniprot accession number (if available) or NCBI/GenBank accession number. Score, queries matched, peptide matches, different peptide matches, experimental mass and theoretical mass are also presented. Finally, CPs were classified according to the classification of Richau *et al.* (2012) [37].

| Zone (kDa)    | Protein accession no [ <i>Brassica napus</i> ] / NCBI accession no. | Score | Queries Matched | Peptides matched | Different matched peptides | Exp. Mass (Da) | Theo. Mass (Da) | Theo. pI | Classification |
|---------------|---------------------------------------------------------------------|-------|-----------------|------------------|----------------------------|----------------|-----------------|----------|----------------|
| <b>1 (40)</b> | PREDICTED: cysteine proteinase RD21a-like A0A078FVG4                | 161   | 7               | 7                | 6                          | 50625          | 50657.95        | 5.23     | RD21-like      |
|               | PREDICTED: cysteine proteinase RD21a A0A078EXH0                     | 158   | 10              | 10               | 6                          | 50452          | 50484.76        | 5.3      | RD21-like      |
|               | cysteine proteinase RD21a A0A078FXL6                                | 146   | 10              | 10               | 6                          | 50534          | 50566.84        | 5.23     | RD21-like      |
|               | PREDICTED: cysteine proteinase RD21a-like A0A078G7A3                | 64    | 3               | 3                | 2                          | 50506          | 50539.07        | 5.57     | RD21-like      |
| <b>2 (35)</b> | PREDICTED: cysteine proteinase RD21a-like A0A078G7A3                | 120   | 5               | 5                | 3                          | 50506          | 50539.07        | 5.57     | RD21-like      |
|               | PREDICTED: cysteine proteinase RD21a-like A0A078EXH0                | 97    | 4               | 4                | 4                          | 50452          | 50484.76        | 5.3      | RD21-like      |
|               | PREDICTED: cysteine proteinase RD21a-like A0A078FVG4                | 94    | 5               | 5                | 4                          | 50625          | 50657.95        | 5.23     | RD21-like      |
| <b>3 (30)</b> | PREDICTED: cysteine proteinase RD21a-like A0A078FVG4                | 74    | 3               | 3                | 3                          | 50625          | 50657.95        | 5.23     | RD21-like      |
|               | PREDICTED: cysteine proteinase RD21a-like A0A078EXH0                | 71    | 3               | 3                | 3                          | 50452          | 50484.76        | 5.3      | RD21-like      |
| <b>4 (25)</b> | Senescence-specific cysteine protease SAG12-like Q9SQH3             | 143   | 8               | 8                | 7                          | 38333          | 38357.54        | 6.99     | SAG12-like     |
|               | PREDICTED: cysteine proteinase RD21a-like A0A078EXH0                | 68    | 5               | 5                | 4                          | 50452          | 50484.76        | 5.3      | RD21-like      |
|               | PREDICTED: cysteine proteinase RD21a-like A0A078FVG4                | 63    | 4               | 4                | 4                          | 50625          | 50657.95        | 5.23     | RD21-like      |
|               | PREDICTED: cysteine proteinase RD21a-like A0A078G7A3                | 47    | 3               | 3                | 2                          | 50506          | 50539.07        | 5.57     | RD21-like      |
